# Supplementary material for: CipA mediates complement resistance of Acinetobacter baumannii by formation of a factor I-dependent quadripartite assemblage
Source: PubMed Central journal article supplement (PMC9361855; doi:10.3389/fimmu.2022.942482), 2022-07-26
Supplement: DataSheet_1.pdf [file DataSheet_1.pdf]

## Supplementary figure 1

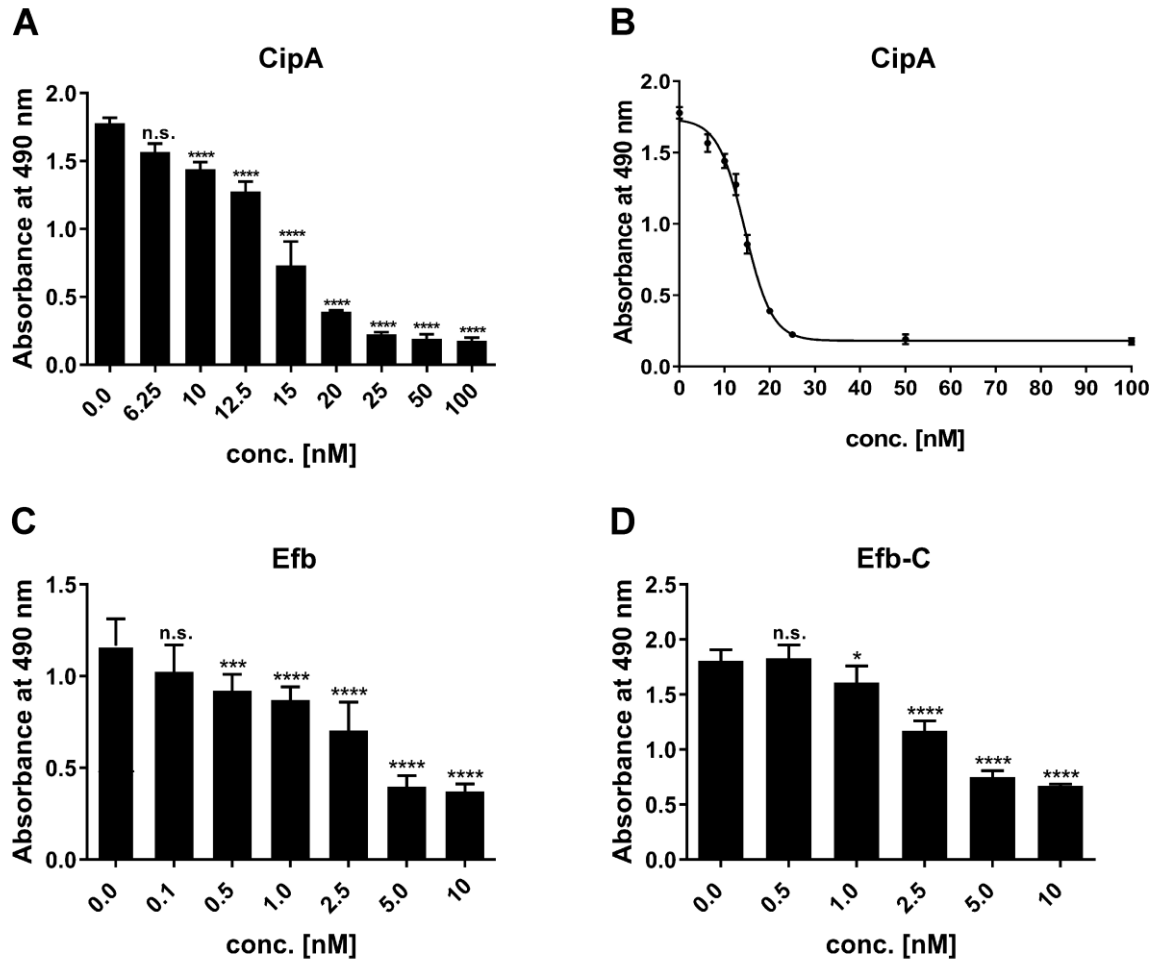

**Dose-dependent inhibition of the AP.** Dose-dependent inhibition of the AP mediated by CipA (A and B), Efb (C), and Efb-C (D) was assessed by WiELISA. Microtiter plates immobilized with LPS were incubated with NHS prior incubated with increasing concentrations of bacterial proteins. The formation of the MAC was detected by using a monoclonal anti-C5b-9 antibody. Data represent means and standard deviation of at least three different experiments, each conducted in triplicate. \*,  $p \leq 0.05$ ; \*\*\*,  $p \leq 0.0002$ ; \*\*\*\*,  $p \leq 0.0001$ , n.s., no statistical significance, one-way ANOVA with post-hoc Bonferroni multiple comparison test (confidence interval = 95%). Binding curve and dissociation constant were approximated via non-linear regression, using a one-site, specific binding model using GraphPad Prism version 7.
