# Supplementary material for: CipA mediates complement resistance of Acinetobacter baumannii by formation of a factor I-dependent quadripartite assemblage
Source: PubMed Central journal article supplement (PMC9361855; doi:10.3389/fimmu.2022.942482), 2022-07-26
Supplement: DataSheet_3.pdf [file DataSheet_3.pdf]

## Supplementary figure 3

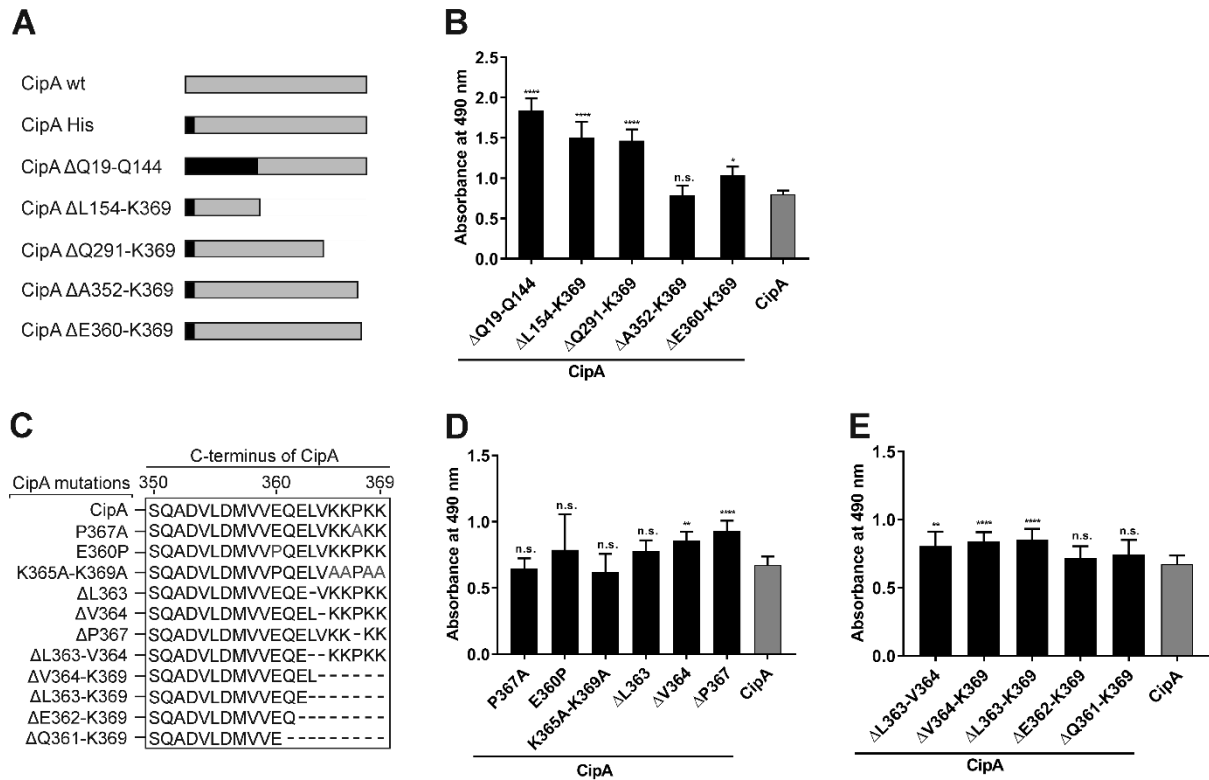

**Binding of C3b to CipA variants.** Schematic representation of N- and C-terminal deletion CipA variants (A) the introduced deletions and substitutions within the C-terminus of CipA (C). Protein binding of C3b to CipA variants was measured by ELISA (B, D, and E). CipA (5 ng/μl) coated wells were incubated with purified C3b (5 ng/μl) and antigen-antibody complexes were detected using an anti-C3 antibody (1:1,000). Data represent means and standard deviation of at least three different experiments, each conducted in triplicate. \*,  $p \leq 0.05$ ; \*\*,  $p \leq 0.005$ ; \*\*\*\*,  $p \leq 0.0001$ , n.s., no statistical significance, one-way ANOVA with post-hoc Bonferroni multiple comparison test (confidence interval = 95%).
