# Supplementary material for: CipA mediates complement resistance of Acinetobacter baumannii by formation of a factor I-dependent quadripartite assemblage
Source: PubMed Central journal article supplement (PMC9361855; doi:10.3389/fimmu.2022.942482), 2022-07-26
Supplement: DataSheet_7.pdf [file DataSheet_7.pdf]

## Supplementary figure 7

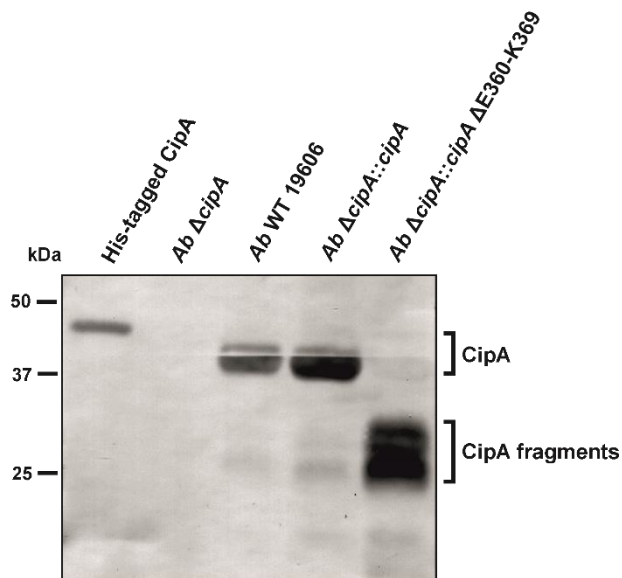

**Characterization of *A. baumannii* strains producing diverse CipA variants.** CipA was detected in cell lysates (10  $\mu$ g each) of *A. baumannii*  $\Delta$ *cipA*, WT 19606 WT,  $\Delta$ *cipA*::*cipA* and  $\Delta$ *cipA*::*cipA*  $\Delta$ E360-K369 by Western blotting using an anti-CipA antibody (1:100). His-tagged CipA was used as control. Native CipA was indicated on the left as well as CipA fragments in strain *A. baumannii*  $\Delta$ *cipA*::*cipA*  $\Delta$ E360-K369.
