# Supplementary material for: CipA mediates complement resistance of Acinetobacter baumannii by formation of a factor I-dependent quadripartite assemblage
Source: PubMed Central journal article supplement (PMC9361855; doi:10.3389/fimmu.2022.942482), 2022-07-26
Supplement: DataSheet_8.pdf [file DataSheet_8.pdf]

## **Supplementary figure 8**

**Structural prediction of CipA and CipA E360P obtained with AlphaFold2.** Structure prediction was created by using the AlphaFold 2 advanced interface with the default settings using the optional “Refine structures with Amber-Relax” option.
