# Supplementary material for: CipA mediates complement resistance of Acinetobacter baumannii by formation of a factor I-dependent quadripartite assemblage
Source: PubMed Central journal article supplement (PMC9361855; doi:10.3389/fimmu.2022.942482), 2022-07-26
Supplement: DataSheet_9.pdf [file DataSheet_9.pdf]

## Supplementary figure 9

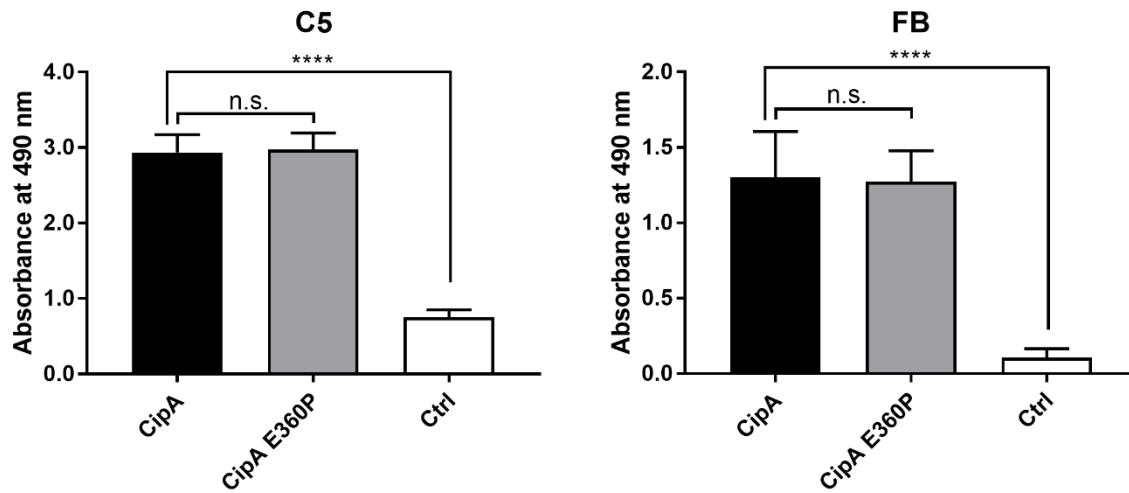

**Binding of CipA E360P to C5 and FB.** Protein binding of C5 and FB to CipA and CipA E360P was measured by ELISA. Purified bacterial proteins and gelatine (5 ng/ $\mu$ l each) used as negative control were immobilized and incubated with 10 ng/ $\mu$ l C5 or FB. Bound complement components were detected using specific antisera (1:1,000). To assess statistical significance, one-way ANOVA with post-hoc Bonferroni multiple comparison test (confidence interval = 95%) was performed. Data represent means and/or standard deviation of at least three different experiments, each conducted in at least triplicate. \*\*\*\*,  $p \leq 0.0001$ ; n.s., no statistical significance.
