# Supplementary material for: CipA mediates complement resistance of Acinetobacter baumannii by formation of a factor I-dependent quadripartite assemblage
Source: PubMed Central journal article supplement (PMC9361855; doi:10.3389/fimmu.2022.942482), 2022-07-26
Supplement: Table_1.pdf [file Table_1.pdf]

**Supplementary table 1. Oligonucleotides used in this study**

| Oligonucleotide                                                                                               | Sequence (5'-3') <sup>a</sup>                         | Use in this work                                                                                         |
|---------------------------------------------------------------------------------------------------------------|-------------------------------------------------------|----------------------------------------------------------------------------------------------------------|
| <b>Generation of CipA variants with single aa substitutions, deletions in various regions, and extensions</b> |                                                       |                                                                                                          |
| CipA-359(-)                                                                                                   | TTTTTTAGGCTTTTTGTGCGACTTCTTAT<br>ACAACCATATCTAACACATC | Generation of CipA <sub>19-359</sub> (aa 19-359),<br>C-terminal deletion of aa 359-369                   |
| CipA-145(+)                                                                                                   | GCATATTTTCCAAGGATCCAAAGCAA<br>CTAATACTCAAGC           | Generation of CipA <sub>145-369</sub> (aa 145-<br>369),<br>N-terminal deletion of aa 19-144              |
| CipA E360A FP                                                                                                 | GTGTTAGATATGGTTGTAGCGCAAGA<br>ACTCGTTAAAAAAGCC        | Generation of variant CipA <sub>E360A</sub>                                                              |
| CipA E360A RP                                                                                                 | CTTTTAAACGAGTTCTTGCGCTACAAC<br>CATATCTAACACATC        | Generation of variant CipA <sub>E360A</sub>                                                              |
| CipA E360P_II FP                                                                                              | GATGTGTTAGATATGGTTGTACCGCA<br>AGAACTCGTTAAAAAAGCC     | Generation of variant CipA <sub>E360P</sub>                                                              |
| CipA E360P_II RP                                                                                              | CTTTTAAACGAGTTCTTGCGGTACAAC<br>CATATCTAACACATCAGC     | Generation of variant CipA <sub>E360P</sub>                                                              |
| CipA Q361A FP                                                                                                 | GTGTTAGATATGGTTGTAGAGGCAGA<br>ACTCGTTAAAAAAGCC        | Generation of variant CipA <sub>Q361A</sub>                                                              |
| CipA Q361A RP                                                                                                 | CTTTTAAACGAGTTCTGCCTCTACAAC<br>CATATCTAACACATC        | Generation of variant CipA <sub>Q361A</sub>                                                              |
| CipA E362A FP                                                                                                 | GATATGGTTGTAGAGCAAGCAACTCG<br>TAAAAAAGCCTAAAAAA       | Generation of variant CipA <sub>E362A</sub>                                                              |
| CipA E362A RP                                                                                                 | GGCTTTTAAACGAGTGCTTGCTCTACA<br>ACCATATCTAACAC         | Generation of variant CipA <sub>E362A</sub>                                                              |
| CipA P367A FP                                                                                                 | CAAGAACTCGTTAAAAAAGGCTAAAAA<br>ATAAGTCGACCTGC         | Generation of variant CipA <sub>P367A</sub>                                                              |
| CipA P367A RP                                                                                                 | GCTTGGCTGCAGGTCGACTTATTTTTT<br>AGCCTTTTAAACGAG        | Generation of variant CipA <sub>P367A</sub>                                                              |
| CipA delta L363 FP                                                                                            | GGTTGTAGAGCAAGAAGTTAAAAAGC<br>CTAAAAAATAAGTC          | Generation of variant CipA <sub>ΔL363</sub><br>lacking a leucine at aa position 363                      |
| CipA delta L363A RP                                                                                           | AGGCTTTTAACTTCTTGCTCTACAAC<br>CATATCTAACAC            | Generation of variant CipA <sub>ΔL363</sub><br>lacking a leucine at aa position 363                      |
| CipA delta V364 FP                                                                                            | GTAGAGCAAGAACTCAAAAAGCCTA<br>AAAAATAAGTCGACCTG        | Generation of variant CipA <sub>ΔV364</sub><br>lacking a valine at aa position 364                       |
| CipA delta V364 RP                                                                                            | GAGTTATTTTTTAGGCTTTTTGAGTTC<br>TTGCTCTACAACC          | Generation of variant CipA <sub>ΔV364</sub><br>lacking a valine at aa position 364                       |
| CipA delta P367 FP                                                                                            | CAAGAACTCTTAAAAAGAAAAATA<br>AGTCGACCTGC               | Generation of variant CipA <sub>ΔP367</sub><br>lacking a proline at aa position 367                      |
| CipA delta P367 RP                                                                                            | GCTTGGCTGCAGGTCGACTTATTTTTT<br>CTTTTAAACGAG           | Generation of variant CipA <sub>ΔV367</sub><br>lacking a proline at aa position 367                      |
| CipA delta L363-<br>V364 FP                                                                                   | GTTGTAGAGCAAGAAAAAAGCCTA<br>AAAAATAAGTCGACCTG         | Generation of variant CipA <sub>ΔL363-V364</sub><br>lacking leucine and valine at positon<br>363 and 364 |
| CipA delta L363-<br>V364 RP                                                                                   | GAGTTATTTTTTAGGCTTTTTTCTTG<br>CTCTACAACC              | Generation of variant CipA <sub>ΔL363-V364</sub><br>lacking leucine and valine at positon<br>363 and 364 |
| CipA-364 FP                                                                                                   | GTAGAGCAAGAACTCGTTTAATAACC<br>TAAAAAATAAGTCGAC        | Generation of variant CipA <sub>ΔV364-K369</sub><br>lacking aa at positions 364 to 369                   |
| CipA-364 RP                                                                                                   | GTAGAGCAAGAACTCGTTTAATAACC<br>TAAAAAATAAGTCGAC        | Generation of variant CipA <sub>ΔV364-K369</sub><br>lacking aa at positions 364 to 369                   |

|              |                                                  |                                                                                        |
|--------------|--------------------------------------------------|----------------------------------------------------------------------------------------|
| CipA-L363 FP | GTTGTAGAGCAAGAACTCTAATAAAA<br>GCCTAAAAATAAGTCGAC | Generation of variant CipA <sub>ΔL363-K369</sub><br>lacking aa at positions 363 to 369 |
| CipA-L363 RP | CGACTTATTTTTTAGGCTTTTATTAGA<br>GTTCTTGCTCTAC     | Generation of variant CipA <sub>ΔL363-K369</sub><br>lacking aa at positions 36 to 369  |
| CipA-E362 FP | GTTGTAGAGCAAGAATAATAAAAAA<br>AGCCTAAAAATAAGTC    | Generation of variant CipA <sub>ΔE362-K369</sub><br>lacking aa at positions 362 to 369 |
| CipA-E362 RP | CTTATTTTTTAGGCTTTTTTTATTATTC<br>TTGCTCTAC        | Generation of variant CipA <sub>ΔE362-K369</sub><br>lacking aa at positions 362 to 369 |
| CipA-Q361 FP | GGTTGTAGAGCAATAATAAGTTAAAA<br>AGCCTAAAAAAT       | Generation of variant CipA <sub>ΔQ361-K369</sub><br>lacking aa at positions 361 to 369 |
| CipA-Q361 RP | GGCTTTTTAACTTATTATTCCTCTACA<br>ACCATATC          | Generation of variant CipA <sub>ΔQ361-K369</sub><br>lacking aa at positions 361 to 369 |
| CipA-E360 FP | GATATGGTTGTAGAGTAATAACTCGT<br>TAAAAAGCCTAAAAAAT  | Generation of variant CipA <sub>ΔE360-K369</sub><br>lacking aa at positions 360 to 369 |
| CipA-E360 RP | GGCTTTTTAACGAGTTACTCTCTACA<br>ACCATATCTAAC       | Generation of variant CipA <sub>ΔE360-K369</sub><br>lacking aa at positions 360 to 369 |

### Generation of *A. baumannii* 19606 strain producing a CipA variant by markerless mutagenesis

|                    |                                                    |                                                                                                                 |
|--------------------|----------------------------------------------------|-----------------------------------------------------------------------------------------------------------------|
| CipA up fwd PstI   | GCGACTGCAGCAAACCTCAGGTTATTG<br>AACTCCCAATGG        | Amplification of the upstream region<br>of the CipA encoding gene in strain <i>A.</i><br><i>baumannii</i> 19606 |
| CipA down rev NotI | GACAGCGGCCGCGGGATTTAATATTT<br>TGCTGCTAAATG         | Amplification of the downstream<br>CipA encoding gene in strain <i>A.</i><br><i>baumannii</i> 19606             |
| CipA V359 RP       | GTTAGATATGGTTGTATAGTAATAAC<br>TCGTTAAAAAGCCTAAAAAA | Introduction of two stop codons after<br>position 359                                                           |
| CipA V359 FP       | GGCTTTTTAACGAGTTACTATACA<br>ACCATATCTAACACATC      | Introduction of two stop codons after<br>position 359                                                           |
| CipA control fwd   | GCTCTTGCTATCTTATGTCACAGATA<br>GCC                  | Control of the complementation in <i>A.</i><br><i>baumannii</i> 19606                                           |
| CipA control rev   | CTGGCTGTCCACCAGGAACACATTTA<br>TTTGC                | Control of the complementation in <i>A.</i><br><i>baumannii</i> 19606                                           |
| CipA seq Fwd       | CAATCCAAACCAACGCGTAATCTTAC<br>GTG                  | Sequencing of <i>cipA</i> gene in the<br>complemented <i>A. baumannii</i> 19606                                 |
| CipA seq Rev       | GGTACTGTGAATTATGTAGATGGTGC<br>C                    | Sequencing of <i>cipA</i> gene in the<br>complemented <i>A. baumannii</i> 19606                                 |

### Primer used for RT-PCR of *A. baumannii* genes

|                     |                        |                                                                       |
|---------------------|------------------------|-----------------------------------------------------------------------|
| <i>rpoB</i> -RT-fwd | GAGTCTAATGGCGGTGGTTC   | RT-PCR, amplification of <i>rpoB</i> in <i>A.</i><br><i>baumannii</i> |
| <i>rpoB</i> -RT-rev | ATTGCTTCATCTGCTGGTTG   | RT-PCR, amplification of <i>rpoB</i> in <i>A.</i><br><i>baumannii</i> |
| CipA-RT-PCR Fwd     | GTCATGTCAACTATGATGGC   | RT-PCR, amplification of <i>cipA</i> in <i>A.</i><br><i>baumannii</i> |
| CipA-RT-PCR Rev     | GCAAGCAAGTTTGTGGTGCAAC | RT-PCR, amplification of <i>cipA</i> in <i>A.</i><br><i>baumannii</i> |

### Primer used for the generation of His-tagged Efb and Efb-C proteins of *Staphylococcus aureus* USA300

|            |                           |                                       |
|------------|---------------------------|---------------------------------------|
| Efb_FP Bam | GCGAGCGAAGGATCCGGTCCAAGAG | Amplification of Efb encoding gene of |
|------------|---------------------------|---------------------------------------|

|              |                                                                            |                                                                                             |
|--------------|----------------------------------------------------------------------------|---------------------------------------------------------------------------------------------|
| Efb_RP_Sal   | AAAAGAAACCAGTGAG<br>GGCTGCAGG <u>TCGACTT</u> ATTTAACTAA<br>TCCTTGTTTTAATAC | <i>S. aureus</i> USA300<br>Amplification of Efb encoding gene of<br><i>S. aureus</i> USA300 |
| Efb-C_FP_Bam | GGTGCAGGATCCCAATTTAATAAACC<br>AGCAGCGAAAAC <u>TG</u>                       | Generation of a C-terminal fragment<br>of Efb                                               |

### Primer used for sequencing

|           |                         |                                |
|-----------|-------------------------|--------------------------------|
| pQE-FP-30 | TTGCTTTGTGAGCGGATAAC    | Sequencing of pQE-30 Xa vector |
| pQE-RP    | CTGAGGTCATTACTGGATCTATC | Sequencing of pQE-30 Xa vector |

---

<sup>a</sup>, Sequences of specific restriction endonuclease recognition sites are underlined
